# Supplementary material
Source: Springer Nature journal article supplement (https://www.springermedizin.de/resource/supplementary/12887_2010_406_MOESM2_ESM.pdf/9475048)

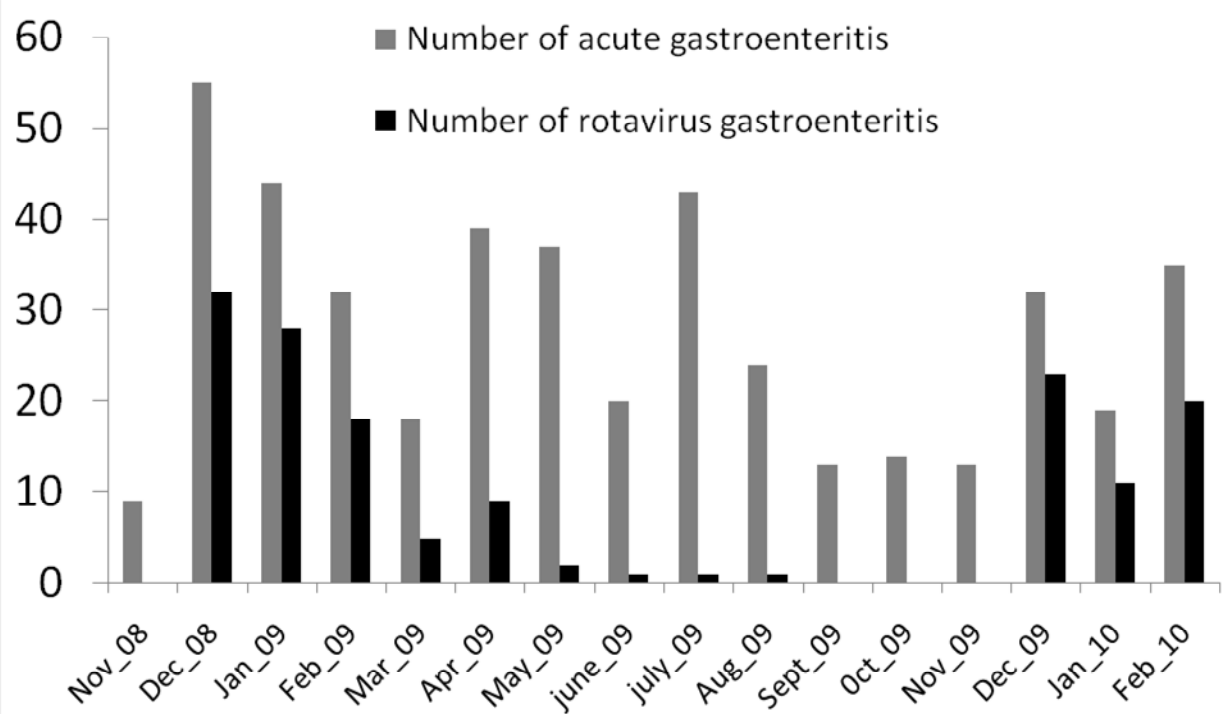

Supplement: MOESM2 [file 9475048]
